# Supplementary material
Source: PubMed Central journal article supplement (PMC3900029)
Supplement: NIHMS546541-supplement-01.pdf [file NIHMS546541-supplement-01.pdf]

## **Supplemental Information**

### **Supplemental Figures**

Supplemental Figure 1) Confirmation of genotype of relevant strains. Constructs bearing the mutants described in Figure 1 were transformed into *frh*<sup>R806H</sup>; *frh*<sup>R806H</sup>, *his-3::pfrqluc* or *qa-2-frh* strains at the *csr-1* locus. Genomic DNA samples from strains were subjected to PCR analysis to examine the *csr-1* locus; primer sequences are provided in Supplemental Table 1. Bands at 350 bp represent the presence of the intact *csr-1* locus, bands at 450 bp represent successfully transformed *frh* disrupting the *csr* locus while bands at 750 bp represent the presence of the *actin* locus (+ control).

*csr-1* locus:

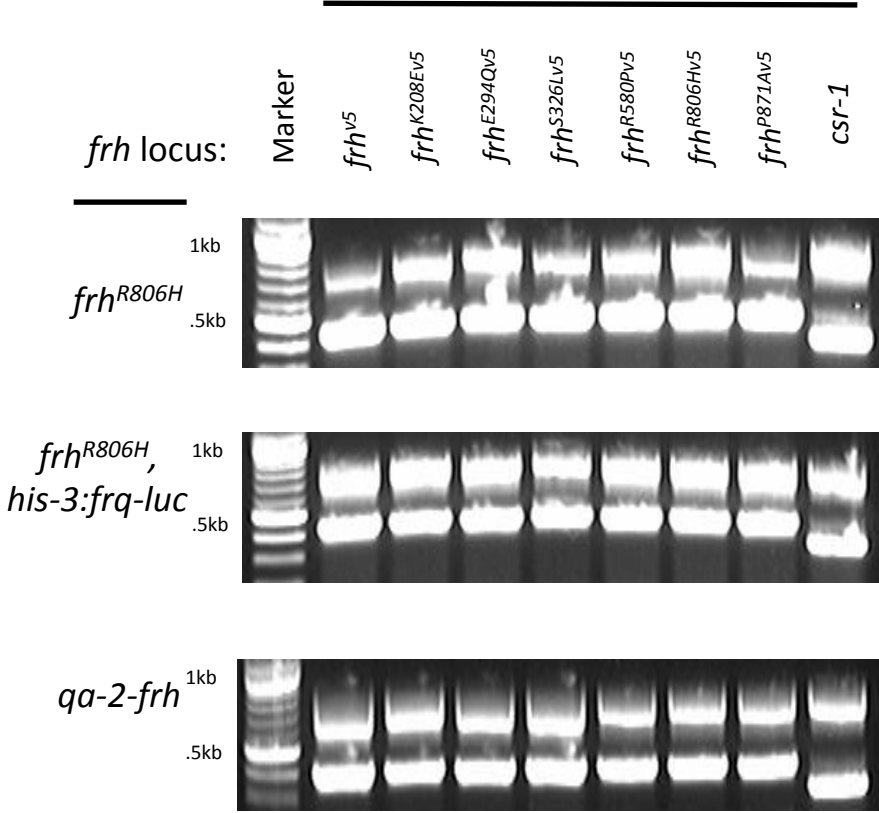

*csr-1* locus:

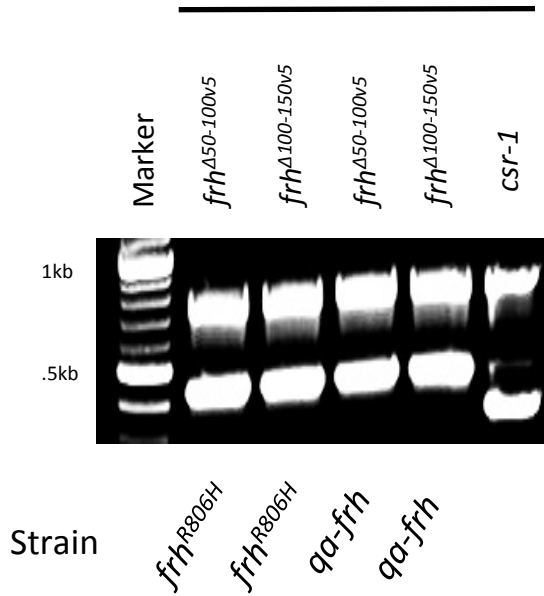

Supplemental Figure 2) Normal circadian rhythmicity in strains bearing mutations in FRH helicase function as detected by a *frq-luc* transcriptional reporter. (A) Strain genotypes: Linkage group 1; at the *csr-1* locus: mutant versions of *frh* driven by the *frh* promoter; at the *his-3* locus: luciferase driven by the *frq* promoter. Linkage group 2; at the *frh* native locus: *frh*<sup>R806H</sup> driven by the native *frh* promoter. (B) Luciferase traces of strains described in Figure 1.

Bioluminescence was sampled every 30 minutes for 9 days in darkness from race tubes of *Neurospora* of the genotypes shown. Luminescence as a function of time with data being normalized and background subtracted. ( $\tau$  = period in hours,  $\sigma$  = standard deviation, n = number of race tubes). (C)

Immunoprecipitation assay confirming that helicase/ATPase mutants of FRH retain stability and ability to interact with FRQ. Western blot of expression or V5 IP of mutant copies of FRH in the FRH<sup>R806H</sup> background confirming expression or interaction. (D) Western blot confirming expression of mutant FRH at the *csr-1* locus in the *qa-2* driven FRH background. (E) Western blot confirming expression of FRH fragments at the *csr-1* locus in the *qa-2* driven FRH and FRH<sup>R806H</sup> backgrounds. (F) Western blot of *qa-2* driven mutant FRH strains confirming expression (10<sup>-2</sup>M QA added). (G) Coomassie stain confirming interaction between in vitro expressed FRQ and FRH. (PI = input, FT = flow through, IP = FRQ immunoprecipitation).

## Linkage Group 1

## Linkage Group 2

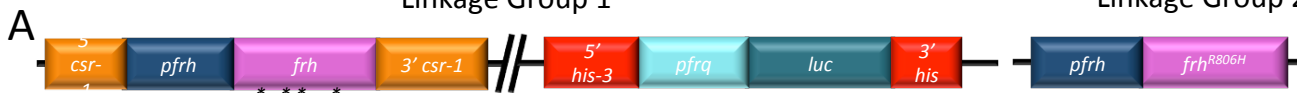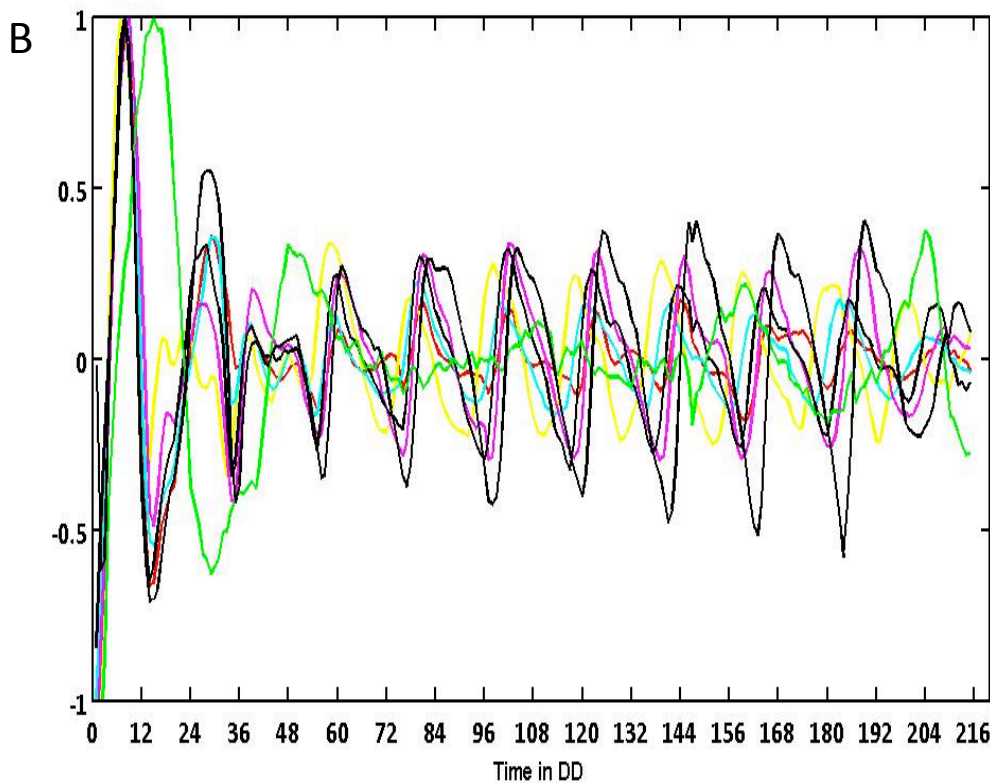

| Strain | $\tau$ +/- $\sigma$ (n=3) |
|--------|---------------------------|
| WT     | 20.9 +/- 0.7              |
| K208E  | 20.3 +/- 3.3              |
| E294Q  | 20.7 +/- 1.3              |
| S326L  | 21.1 +/- 1.0              |
| R580P  | 20.7 +/- 0.8              |
| R806H  | Arr                       |
| R871A  | 20.1 +/- 2.0              |

**D**

*frh* locus:  
*qa-2-frh*  
*csr-1* locus:

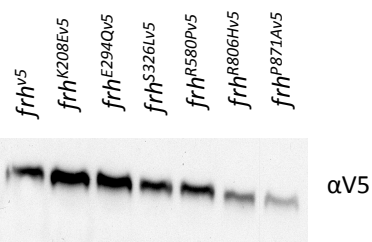**C**

*frh* locus: *frh*<sup>R806H</sup>  
*csr-1* locus:

*frh* locus: *frh*<sup>R806H</sup>  
*csr-1* locus:

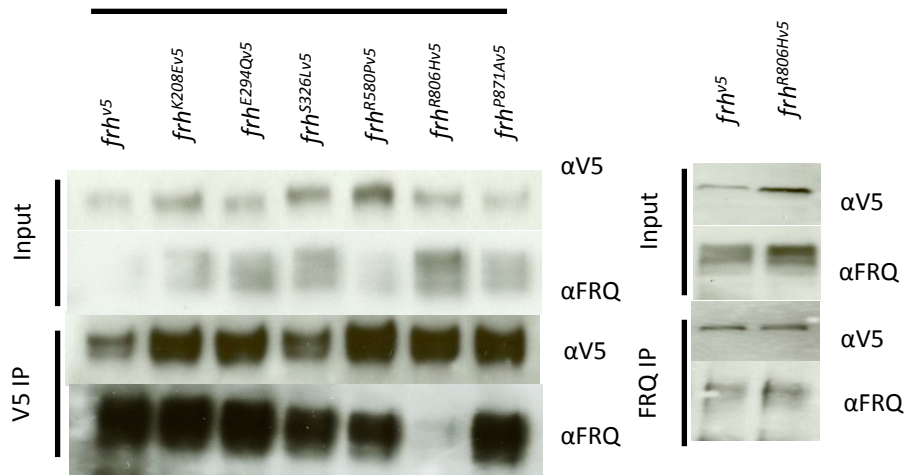**E**

*frh* locus: *frh*<sup>R806H</sup>  
*qa-2-frh* locus:  
*csr-1* locus:

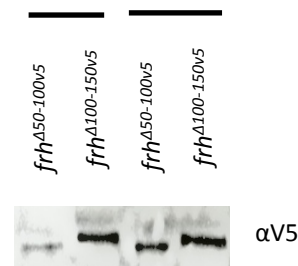**F**

*frh* locus:

*qa-2-frh*  
*qa-2-*  
*frh*<sup>Δ100-150V5</sup>

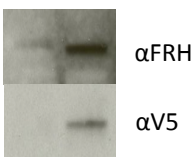**G**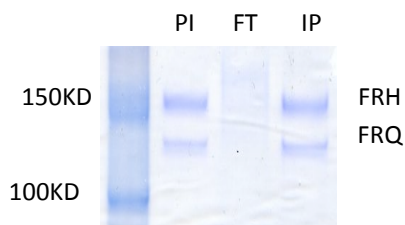

Supplemental Figure 3) Computational analysis of the structural propensity of FRQ, FRH, Mtr4p and clock proteins from eukaryotes using PONDR and additional structural prediction programs. Graphs show PONDR analysis of the full length FRH, Mtr4p, FRQ, PER from *D. melanogaster* and PER-1 from *H. sapiens*. Basic structural domains of each are shown as predicted. Black lines represent distinct and probable regions of low structural complexity (notably absent in first 150 amino acids of Mtr4p). In the cases of FRH and FRQ, structural prediction was also performed by MeDor (Lieutaud et al., 2008) and is aligned with each PONDR graph. Secondary structural prediction (StrBioLib/Pred2ary) is the top line of each and denotes predicted alpha helices (red bars) and beta sheets (blue arrows). IUPred predicted unstructured regions are shown in red; GlobPlot2 predicted unstructured regions are shown in black; DisEMBL predicted unstructured regions are shown in green; FoldIndex predicted unstructured regions are shown in brown; and RONN predicted unstructured regions are shown in purple.

## FRQ (*N. crassa*)

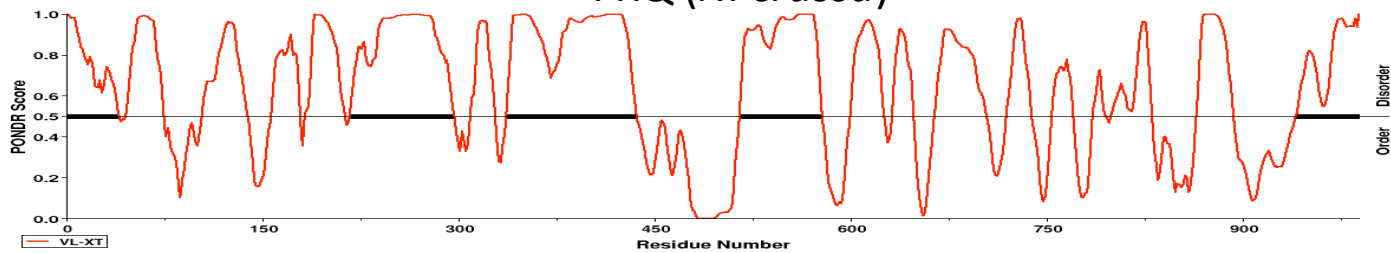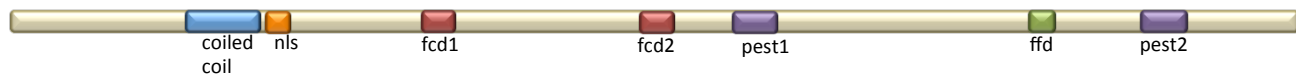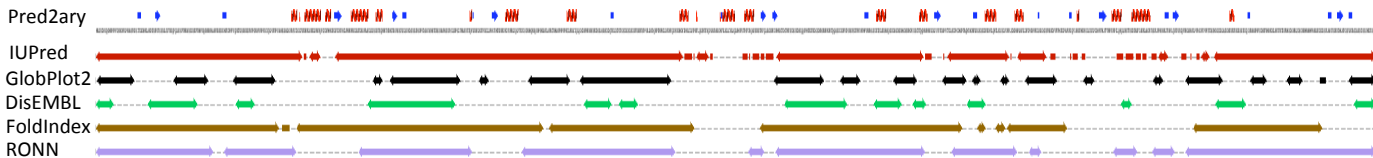

## FRH (*N. crassa*)

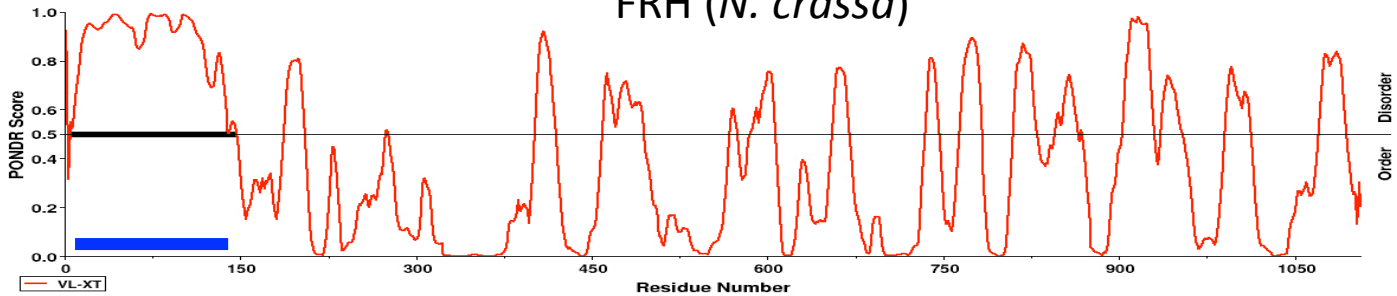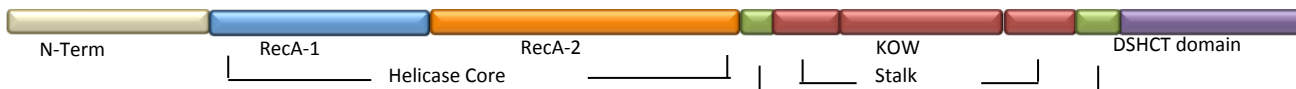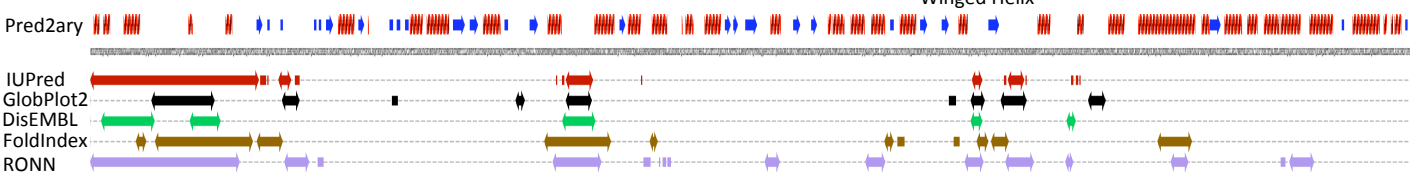

## Mtr4 (*S. cerevisiae*)

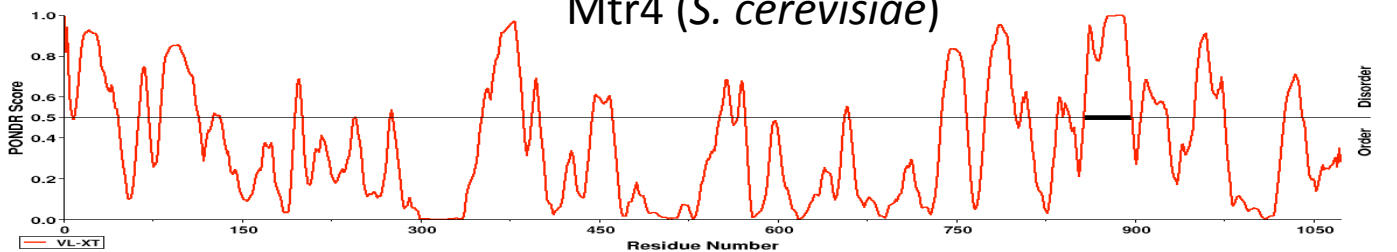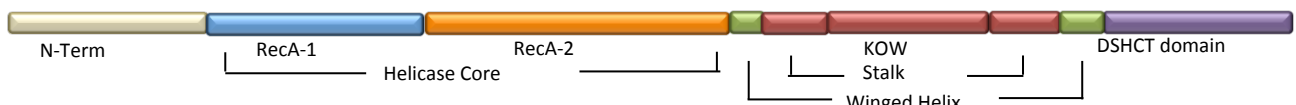

## PER (*D. melanogaster*)

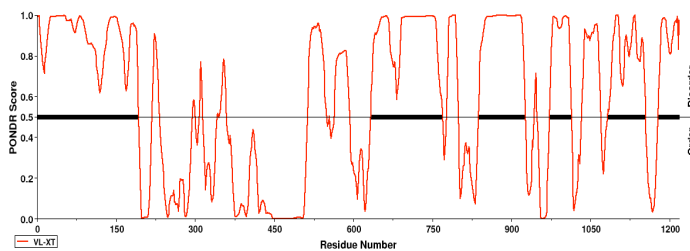

## PER-1 (*H. sapiens*)

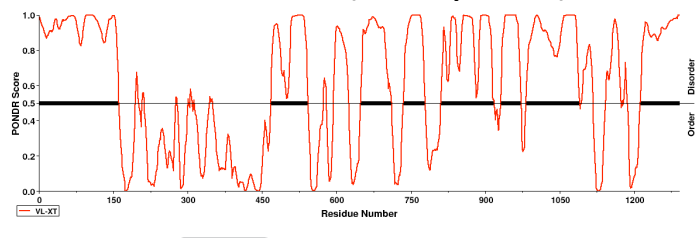

Supplemental Figure 4) PONDR analysis of FRH orthologues from fungi.  
(A) PONDR analysis of the first three hundred amino acids of a variety of fungi that have been shown to either have (Red) or not have (blue) *frq* in their genome sequence. (B) Phylogenetic tree of FRH adapted from (Salichos and Rokas, 2010) showing species used in part (A).

A

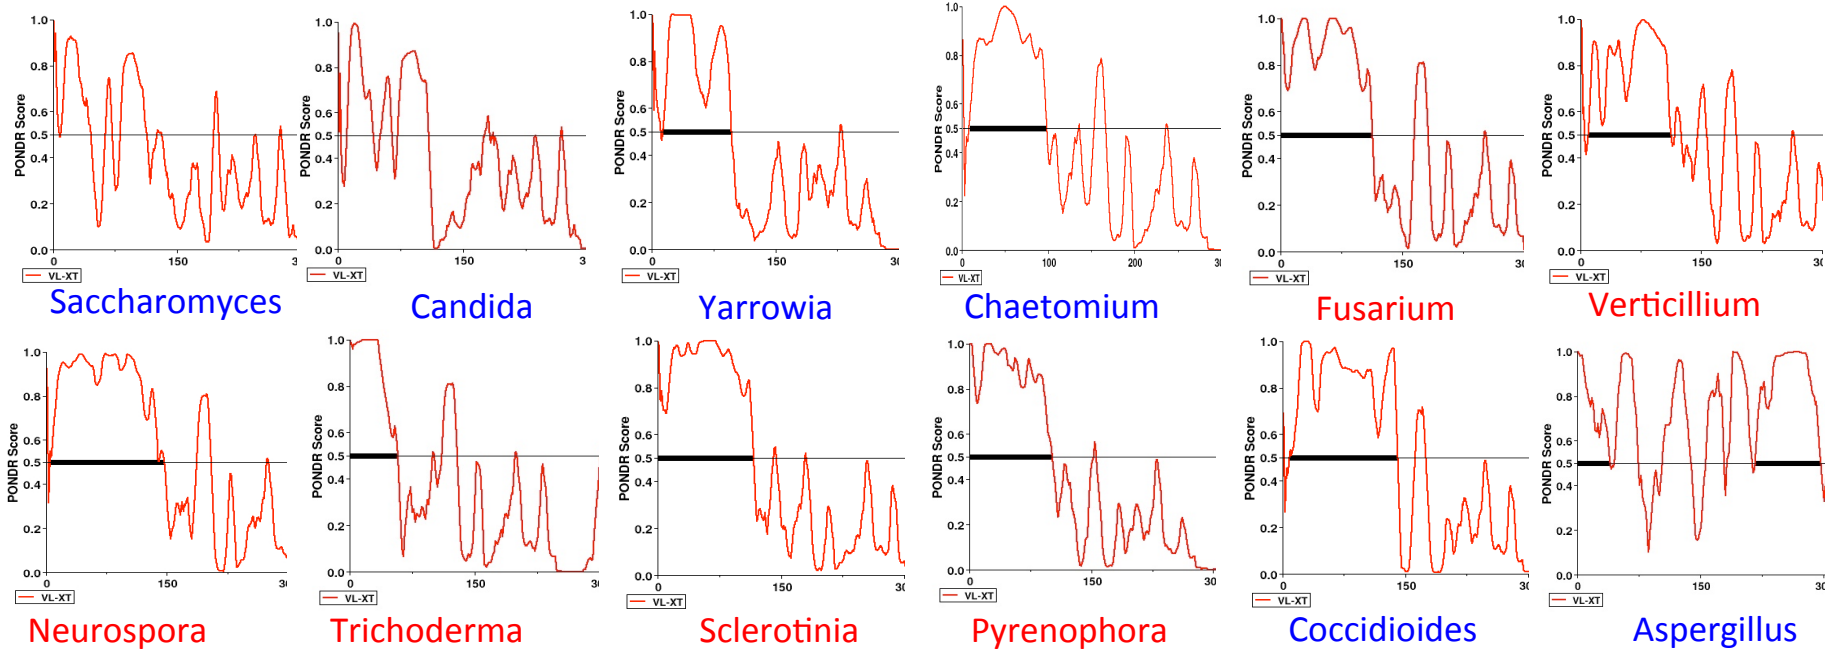

B

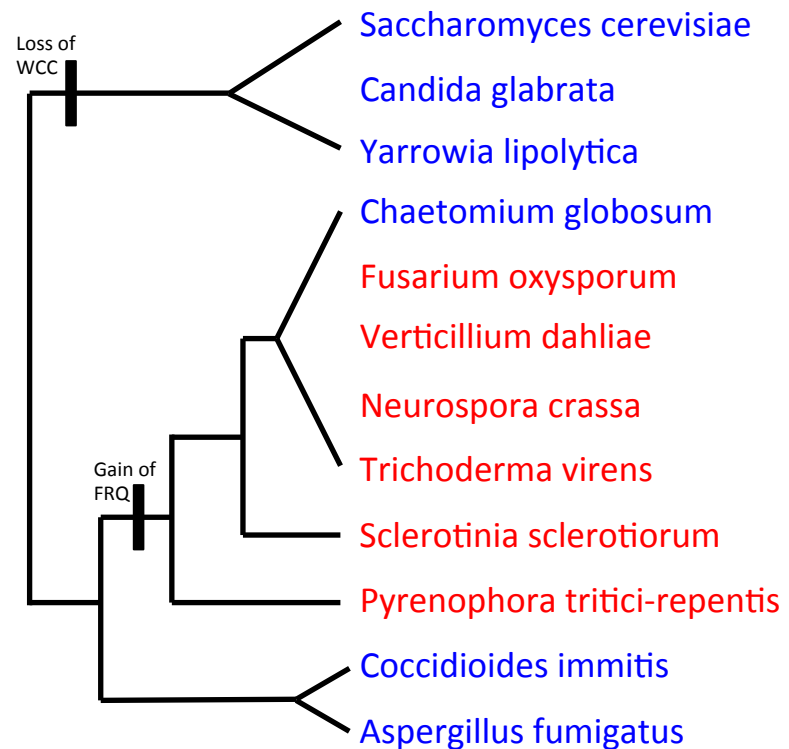



## **Supplemental Materials and Methods**

### **Strains, plasmids and reagents**

Transformations were performed as described (Bardiya and Shiu, 2007; Colot et al., 2006) and screened by allele-specific nested PCR (Supplemental Figure 1) (primers in Supplemental Data Table 1). Strains are listed in supplemental data table 2. Strains have been deposited into the FGSC.

Race tube assays, circadian liquid culture experiments, luciferase trace experiments, and FRQ degradation experiments were performed as described with slight modifications (Garceau et al., 1997; Gooch et al., 2008; Hong et al., 2008; Loros et al., 1989; Ruoff et al., 2005). For *Neurospora* culture, conidia were inoculated into Bird medium (Metzenberg, 2004) containing 1.8% glucose.

The *E. coli* strain BL21(DE3) ( $F^-$  *ompT* *hsdS<sub>β</sub>*(*r<sub>β</sub>-m<sub>β</sub>*) *dcm gal* (DE3) *tonA*) (Invitrogen) was used for all protein expression. The *E. coli* strain TOP10 ( $F^-$  *mcrA*  $\Delta$ (*mrr-hsdRMS-mcrBC*)  $\phi$ 80/*lacZ* $\Delta$ M15  $\Delta$ *lacX74* *recA1* *araD139*  $\Delta$ (*ara-leu*) 7697 *galU galK rpsL* (Str<sup>R</sup>) *endA1 nupG*  $\lambda^-$ ) (Invitrogen) was used for all cloning experiments. Short-FRQ and FRH, codon optimized as designed by the authors for expression in *E. coli* were created by Genscript and cloned into pCOLD1 (a generous gift from the Masayori Inouye lab). All bacterial liquid cultures were grown in LB media (M9) at 17 °C, unless otherwise noted. The working concentration of ampicillin was 100g/ml. The accuracy of the DNA sequences of PCR products used for cloning was confirmed by automated DNA sequence analysis.

## **Western blots, protein preparation and immunoprecipitation**

Protein lysates were prepared on a small scale with a protease inhibitor mixture (P9599; Sigma). For Western blot analysis, 10 µg of total protein was loaded per lane. Anti-V5 antibody (Invitrogen) was diluted 1:5,000. Anti-FLAG antibody was diluted 1:1000 (F3165, Sigma). Anti-FRQ antibody was diluted 1:250 (Garceau et al., 1997). Anti-FRH antibody was diluted 1:10,000 (Shi et al., 2010). SuperSignal West Femto ECL (Pierce) was used for signal development.

To perform the co-IP assay, 1 mg of total protein extract was incubated with 30 µL of anti-V5 antibody-coated agarose (A7345; Sigma), ANTI-FLAG M2 Magnetic beads (A2220, Sigma) or Protein G Mag Sepharose beads (28-9440-08, GE Healthcare) with appropriate antibody (overnight at 4 °C). The agarose/beads were washed with protein extraction buffer four times before elution with Laemmle buffer (65 °C for 15 min) before loading on the gel.

## **Luciferase assays**

Assays were performed and analyzed as described in (Gooch et al., 2008; Larrondo et al., 2012).

## **Protein structural prediction**

Proteins were subjected to PONDR and MeDor analysis as described (Li et al., 1999; Lieutaud et al., 2008; Romero et al., 1997; Romero et al., 2001) As part of the MeDor analysis, structural predictions from StrBioLib/Pred2ary (Chandonia, 2007), IUPred (Dosztanyi et al., 2005), Globplot2 (Linding et al.,

2003b), DisEMBL (Linding et al., 2003a), FoldIndex (Prilusky et al., 2005) and RONN (Yang et al., 2005) were analyzed.

### **Protein stability assay**

Whole cell protein extracts from *Neurospora crassa* were diluted to 10mg/ml. 200ul aliquots were treated with proteinase K (0.2 ug/ml final concentration) and placed at 37°C. A 20-µl sample was taken from the reaction at each time point (0, 15, 30, 45 and 60 mins) after addition of proteinase K. Protein samples were mixed with protein loading buffer and resolved by SDS-PAGE and subjected to western blot analysis.

### **Recombinant FRQ and FRH**

Protein from short-frq(His)6-pCOLD1 and frh(His)6-pCOLD1 constructs were transformed into BL21(DE3) cells and induced with 1mM isopropyl 1-thio-β-D-galactopyranoside for 6 h. Cells were disrupted using sonication; the protein extracts were applied to nickel-nitrilotriacetic acid resin (Qiagen), and the His6-tagged proteins were purified as recommended by Qiagen, followed by passage over a ZEBA desalting column (Thermo Scientific). The protein content of each eluted fraction was visualized by SDS-PAGE followed by Coomassie staining.

### **Circular Dichroism**

CD spectra were recorded at 20°C on a Jasco J-815 CD spectrometer equipped with a Peltier temperature control system and the data was collected using the Jasco Spectra Manager II software package. The proteins were

prepared in 10 mM potassium phosphate at a concentration of 2.5 mg/ml and 0.85 mg/ml for FRQ and FRH respectively. CD spectra were measured between 200 and 250 nm in a 1 mm cuvette and averaged from three scans. The contribution of buffer was subtracted from experimental spectra. The mean residue weight (MRW) was calculated by  $MRW = \text{molecular weight [Da]} / (\text{number of residues} - 1)$ . The mean ellipticity values  $[\theta]$  were calculated by  $[\theta] = (\text{millidegrees value} \times MRW) / (\text{pathlength [mm]} \times \text{concentration [mg/ml]})$ .

### ***Supplemental References***

- Bardiya, N., and Shiu, P.K. (2007). Cyclosporin A-resistance based gene placement system for *Neurospora crassa*. *Fungal Genet Biol* 44, 307-314.
- Chandonia, J.M. (2007). StrBioLib: a Java library for development of custom computational structural biology applications. *Bioinformatics* 23, 2018-2020.
- Colot, H.V., Park, G., Turner, G.E., Ringelberg, C., Crew, C.M., Litvinkova, L., Weiss, R.L., Borkovich, K.A., and Dunlap, J.C. (2006). A high-throughput gene knockout procedure for *Neurospora* reveals functions for multiple transcription factors. *Proc Natl Acad Sci U S A* 103, 10352-10357.
- Dosztanyi, Z., Csizmok, V., Tompa, P., and Simon, I. (2005). IUPred: web server for the prediction of intrinsically unstructured regions of proteins based on estimated energy content. *Bioinformatics* 21, 3433-3434.
- Garceau, N.Y., Liu, Y., Loros, J.J., and Dunlap, J.C. (1997). Alternative initiation of translation and time-specific phosphorylation yield multiple forms of the essential clock protein FREQUENCY. *Cell* 89, 469-476.

Gooch, V.D., Mehra, A., Larrondo, L.F., Fox, J., Touroutoutoudis, M., Loros, J.J., and Dunlap, J.C. (2008). Fully codon-optimized luciferase uncovers novel temperature characteristics of the *Neurospora* clock. *Eukaryot Cell* 7, 28-37.

Hong, C.I., Ruoff, P., Loros, J.J., and Dunlap, J.C. (2008). Closing the circadian negative feedback loop: FRQ-dependent clearance of WC-1 from the nucleus. *Genes Dev* 22, 3196-3204.

Larrondo, L.F., Loros, J.J., and Dunlap, J.C. (2012). High-resolution spatiotemporal analysis of gene expression in real time: in vivo analysis of circadian rhythms in *Neurospora crassa* using a FREQUENCY-luciferase translational reporter. *Fungal Genetics and Biology : FG & B* 49, 681-683.

Li, X., Romero, P., Rani, M., Dunker, A.K., and Obradovic, Z. (1999). Predicting Protein Disorder for N-, C-, and Internal Regions. *Genome Inform Ser Workshop Genome Inform* 10, 30-40.

Lieutaud, P., Canard, B., and Longhi, S. (2008). MeDor: a metaserver for predicting protein disorder. *BMC Genomics* 9 *Suppl 2*, S25.

Linding, R., Jensen, L.J., Diella, F., Bork, P., Gibson, T.J., and Russell, R.B. (2003a). Protein disorder prediction: implications for structural proteomics. *Structure* 11, 1453-1459.

Linding, R., Russell, R.B., Neduva, V., and Gibson, T.J. (2003b). GlobPlot: Exploring protein sequences for globularity and disorder. *Nucleic acids research* 31, 3701-3708.

Loros, J.J., Denome, S.A., and Dunlap, J.C. (1989). Molecular cloning of genes under control of the circadian clock in *Neurospora*. *Science* 243, 385-388.

Metzenberg, R.L. (2004). Bird Medium: an alternative to Vogel Medium. *Fungal Genetics Newsletter* 51, 19-10.

Prilusky, J., Felder, C.E., Zeev-Ben-Mordehai, T., Rydberg, E.H., Man, O., Beckmann, J.S., Silman, I., and Sussman, J.L. (2005). FoldIndex: a simple tool to predict whether a given protein sequence is intrinsically unfolded. *Bioinformatics* 21, 3435-3438.

Romero, Obradovic, and Dunker, K. (1997). Sequence Data Analysis for Long Disordered Regions Prediction in the Calcineurin Family. *Genome Inform Ser Workshop Genome Inform* 8, 110-124.

Romero, P., Obradovic, Z., Li, X., Garner, E.C., Brown, C.J., and Dunker, A.K. (2001). Sequence complexity of disordered protein. *Proteins* 42, 38-48.

Ruoff, P., Loros, J.J., and Dunlap, J.C. (2005). The relationship between FRQ-protein stability and temperature compensation in the *Neurospora* circadian clock. *Proceedings of the National Academy of Sciences of the United States of America* 102, 17681-17686.

Salichos, L., and Rokas, A. (2010). The diversity and evolution of circadian clock proteins in fungi. *Mycologia* 102, 269-278.

Shi, M., Collett, M., Loros, J.J., and Dunlap, J.C. (2010). FRQ-interacting RNA helicase mediates negative and positive feedback in the *Neurospora* circadian clock. *Genetics* 184, 351-361.

Yang, Z.R., Thomson, R., McNeil, P., and Esnouf, R.M. (2005). RONN: the bio-basis function neural network technique applied to the detection of natively disordered regions in proteins. *Bioinformatics* 21, 3369-3376.
